# Supplementary material
Source: Research Square preprint supplement (doi:10.21203/rs.3.rs-9230995/v1)
Supplement: Supplementary file 1 [file 2b90789405f3d0b197882ae5.pdf]

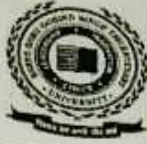

SGT Medical College, Hospital & Research Institute Budhera, Gurgaon  
**FACULTY OF MEDICINE & HEALTH SCIENCES, SGT UNIVERSITY**  
**INSTITUTIONAL ETHICS COMMITTEE**  
 (Registered by:- CDSCO& DHR)

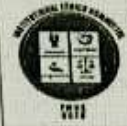

Date:08-11-2024

IEC/FMHS/F/2023-09

Dr. Pradeep Garg  
Chairperson, IEC

Dr. S.K Bansal,  
Co -Chairperson

Dr. Nimarpreet Kaur  
Member, Secretary

Dr. Ruchika Kalra  
Basic Medical Scientist

Dr. Nidhi Bedi  
Clinician

Dr. Mukesh Sharma  
Member, IEC

Dr. Rajeev Sen  
Member, IEC

Dr. Deepti Dwivedi  
Member, IEC

Dr. Jeevan Jyoti Meena  
Member, IEC

Mr. Naveen Kumar Singh  
Member, IEC

Dr. Amit Bhardwaj  
Member, IEC

Dr. Shalini Kapoor  
Member, IEC

Dr. Manpreet Kaur  
Member, IEC

Dr. Amra Ahsal  
Social Scientist

Dr. Sushma Chaturvedi  
Member, IEC

Ms. Yogita Jain  
Legal Expert

Dr. Akansha Yadav  
Sentific Expert

Mrs. Savitri  
Lay Person

Technical Officer  
Mr. Manish Sharma  
Administrative Assistance

To  
 Dr. Sunita Vashisht,  
 Associate Professor,  
 Community Medicine,  
 Principal Investigator,  
 FMHS and SGTH  
 SGTU

**Sub: Ethical clearance for project titled "Prevalence of Type II Diabetes & Hypertension and associated socio-demographic, lifestyle factors and perceived stress parameters in the age group of 30 to 70 years in a rural area of Gurugram district, Haryana."**

Dear Dr. Sunita Vashisht,

The following documents submitted by Dr. Sunita Vashisht (Investigator), to the Institutional Ethics Committee were reviewed:

1. Research Protocol for the Study
2. Study Proforma
3. Investigator Undertaking
4. CV of the Investigator

In case of investigator's retirement / leaving the institute, clinical research study responsibility should be transferred to the Co- investigator after obtaining clearance from IEC.

In the event(s) of any amendments in protocol and to any other previously approved documents, the IEC must be informed and only after approval the amendment (s) then can be implemented. Amendments should be highlighted in clear terms, i.e. the exact alteration / amendment should be specified and indicated where the amendments occurred in the original documents of the clinical research study.

Any deviation/ Violation along with supporting documents (Source Notes) / waiver in the protocol must be informed to the Institutional Ethics Committee.

Reference to above, I am directed you to convey that with due approval of the members of IEC and Dean, Faculty of Medicine and Health Sciences, SGT university, the project to be undertaken at SGTH site, stands cleared Institutional Ethics Committee, Faculty of Medicine and Health Sciences, SGT University.

Please note that the Institutional Ethics Committee is constituted as per ICH-GCP, new Drugs and Clinical Trials Rules 2019 & ICMR Guidelines.

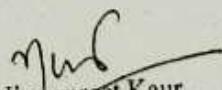  
 Dr. Nimarpreet Kaur,  
 Member, Secretary, IEC  
 Institutional Ethics Committee  
 Faculty of medicine and health sciences  
 SGT University
